# Supplementary material for: Molecular mechanisms of biomaterial-driven osteogenic differentiation in human mesenchymal stromal cells
Source: Royal Society of Chemistry journal article supplement (doi:10.1039/c3ib40027a), 2013-05-10
Supplement: c3ib40027a_2.pdf [file c3ib40027a_2.pdf]

**Figure S1.**

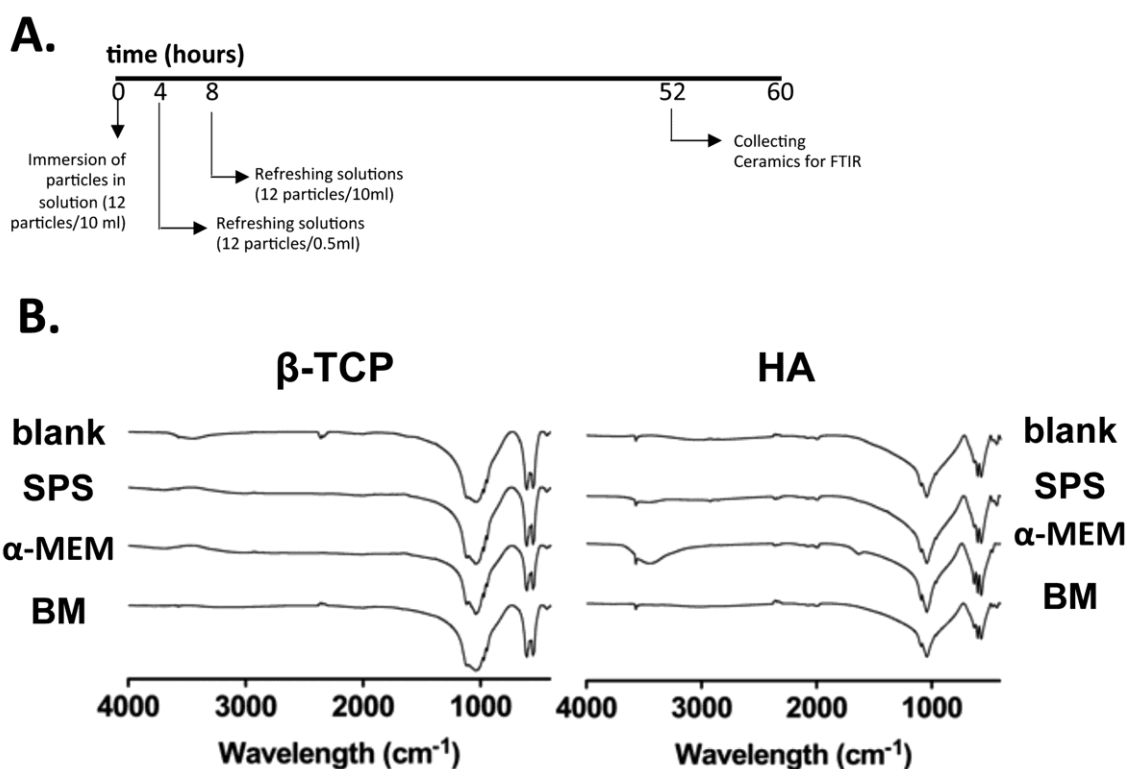

Figure S1. Changes in chemical composition after immersion in SPS,  $\alpha$ -MEM or BM are detected by FTIR. Blank refers to ceramic particles before incubation. A. HA and  $\beta$ -TCP particles were incubated for 52 hours in SPS,  $\alpha$ -MEM or BM. At 4 and 8 hours, solutions were refreshed. After 52 hours, particles were collected for FTIR analysis. B. There were no evident differences detected between the different spectra.
